# Supplementary material
Source: publisher figshare collection journal article supplement (https://acs.figshare.com/ndownloader/files/35116515)
Supplement: Supplementary file 1 [file 35116515]

## **Supplementary Information**

### **Comparative Account of Biomolecular Changes Post Epstein Barr Virus Infection of the Neuronal and Glial Cells Using Raman Microspectroscopy**

Omkar Indari<sup>1</sup>, Shweta Jakhmola<sup>1</sup>, Devesh K. Pathak<sup>2,3</sup>, Manushree Tanwar<sup>2</sup>, Meenakshi Kandpal<sup>1</sup>, Amit Mishra<sup>4</sup>, Rajesh Kumar<sup>2</sup>, Hem Chandra Jha<sup>1\*</sup>

<sup>1</sup> Infection Bioengineering Group, Department of Biosciences and Biomedical Engineering, Indian Institute of Technology Indore, Simrol, 453552, India

<sup>2</sup> Materials and Device Laboratory, Department of Physics, Indian Institute of Technology Indore, Simrol, 453552, India

<sup>3</sup> Department of Chemical Engineering, University of Seoul, Seoul, 02504, Republic of Korea

<sup>4</sup> Cellular and Molecular Neurobiology Unit, Indian Institute of Technology Jodhpur, Jodhpur 342011, India

\*Corresponding author

\* = Dr. Hem Chandra Jha, Infection Bioengineering Group, Department of Biosciences and Biomedical Engineering, Indian Institute of Technology Indore, Simrol, 453552, India,  
Email [hemcjha@iiti.ac.in](mailto:hemcjha@iiti.ac.in), Mobile- +91-9971653189

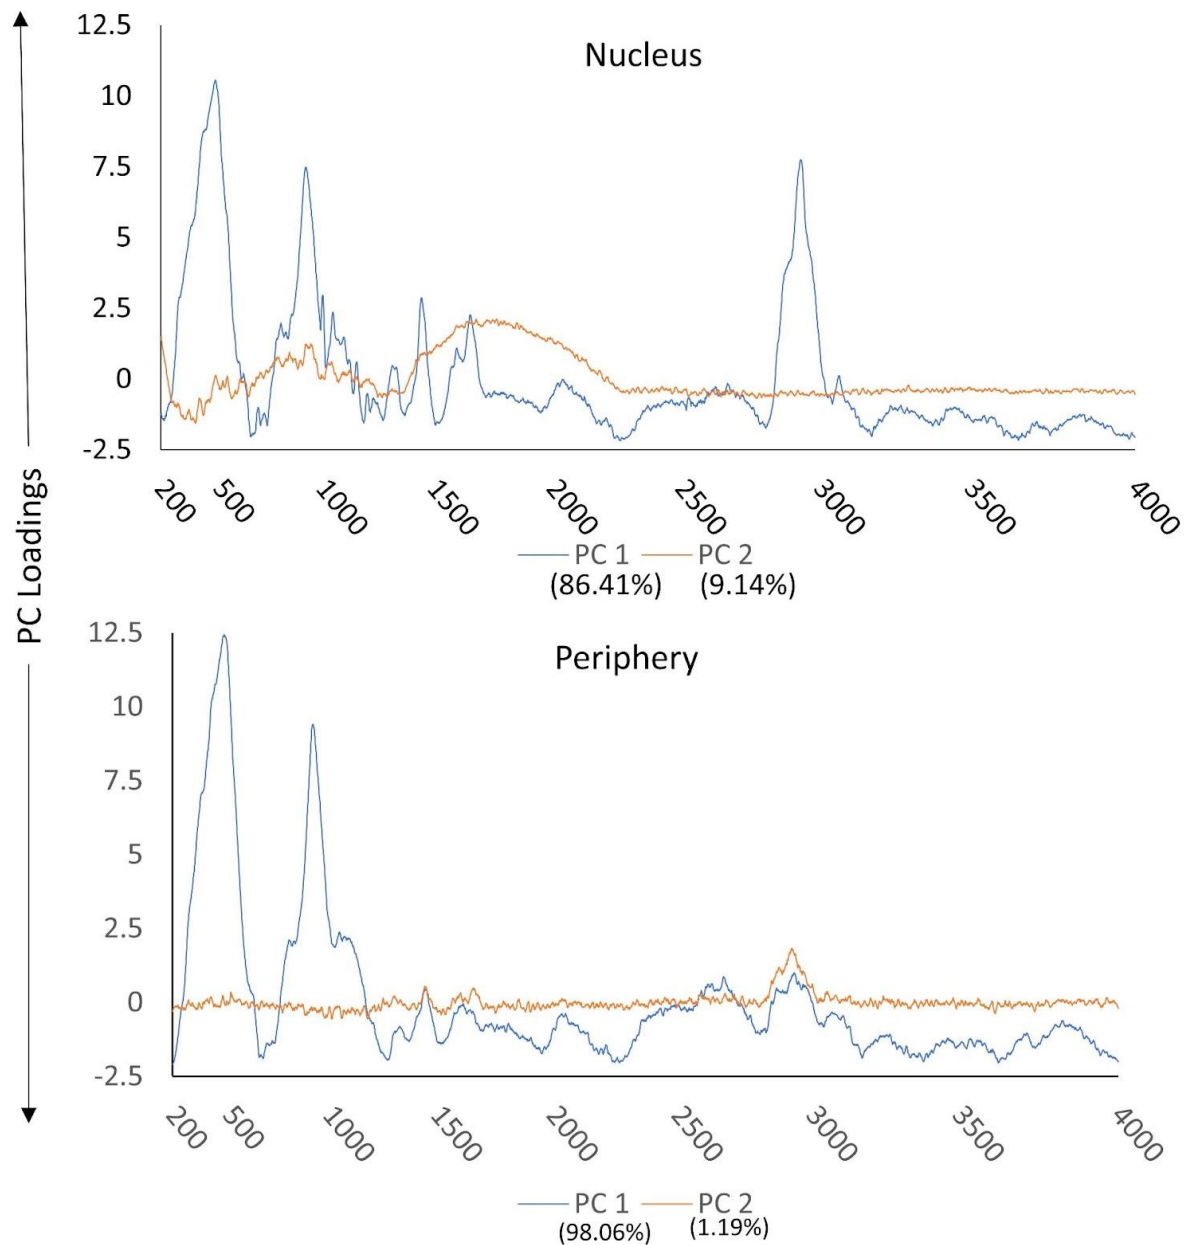

**Figure S1: Loading plots for PC1 and PC2 different timepoints post EBV infection and control at nucleus and periphery sites.**

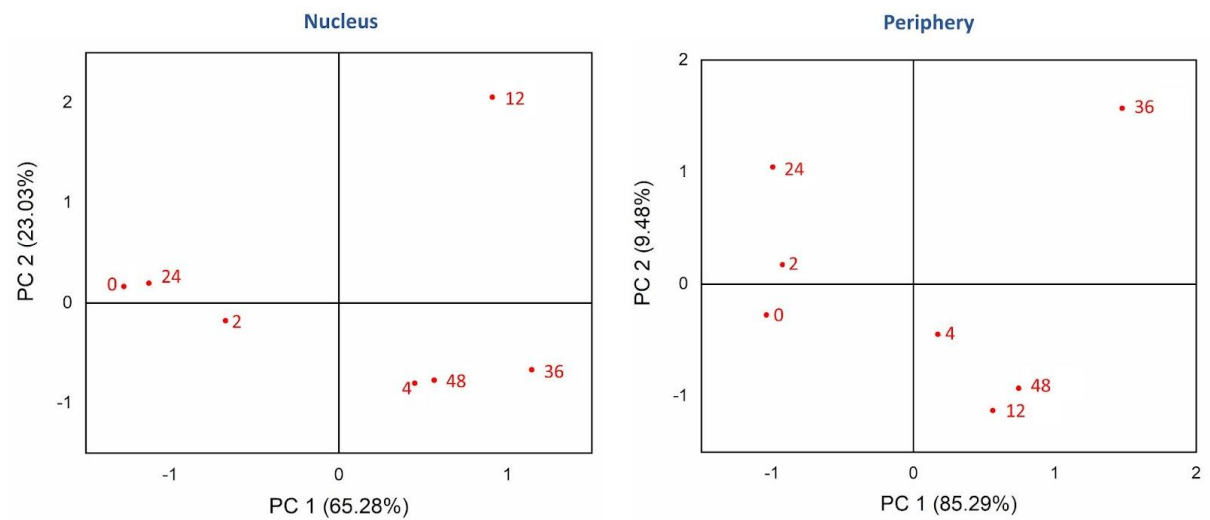

**Figure S2: Principal component analysis biplot of PC1 vs PC2 of different timepoints post EBV infection and control at the nucleus and periphery sites.**
